# Supplementary material for: Discovery of Polyoxypregnane Derivatives From Aspidopterys obcordata With Their Potential Antitumor Activity
Source: Front Chem. 2022 Jan 5;9:799911. doi: 10.3389/fchem.2021.799911 (PMC8766633; doi:10.3389/fchem.2021.799911)
Supplement: Supplementary file 1 [file Table1.XLS]

## Sheet: Sheet1
plate1		Temperature()	1	2	3	4	5	6	7	8	9	10	11	12
		22.4	0.0414	0.0422	0.0428	0.0431	0.0423	0.0428	0.0424	0.043	0.0426	0.0422	0.0452	0.0431
			0.0421	0.6098	0.5791	0.6543	0.6407	0.674	0.6568	0.6776	0.644	0.6889	0.6877	0.0429
			0.0424	0.5997	0.6663	0.6517	0.5976	0.6779	0.6644	0.6731	0.6375	0.6923	0.671	0.0427
			0.0424	0.5942	0.6621	0.6154	0.6489	0.6824	0.672	0.6651	0.6475	0.6593	0.6571	0.0434
			0.0424	0.259	0.6499	0.6511	0.6451	0.6842	0.6708	0.6574	0.6909	0.6931	0.6865	0.0431
			0.0425	0.2428	0.6323	0.6423	0.6508	0.6646	0.7067	0.5906	0.6857	0.6952	0.685	0.0429
			0.0425	0.2491	0.6244	0.6305	0.6365	0.65	0.6579	0.6714	0.6451	0.6875	0.6288	0.043
			0.0424	0.0425	0.0431	0.0426	0.0427	0.0432	0.0427	0.0434	0.0426	0.0428	0.0426	0.0428
plate2			Temperature()	1	2	3	4	5	6	7	8	9	10	11	12
			22.5	0.0427	0.0427	0.0422	0.0427	0.0422	0.0427	0.0445	0.0429	0.0423	0.0423	0.0419	0.0424
				0.0441	0.5874	0.417	0.5296	0.6652	0.3706	0.6074	0.6632	0.619	0.6497	0.6681	0.0426
				0.0423	0.5873	0.4213	0.5389	0.6779	0.3752	0.63	0.6756	0.6218	0.6587	0.6672	0.0428
				0.0425	0.5877	0.4217	0.52	0.6088	0.3776	0.6369	0.6646	0.6283	0.669	0.6307	0.0428
				0.0424	0.2471	0.5015	0.6222	0.6694	0.5174	0.6593	0.6633	0.7051	0.673	0.6583	0.043
				0.0424	0.2427	0.5068	0.6287	0.6723	0.5087	0.6482	0.6779	0.6384	0.6737	0.6623	0.0439
				0.0426	0.2412	0.4933	0.55	0.6602	0.5045	0.643	0.6568	0.6403	0.6361	0.6715	0.0424
				0.0432	0.0423	0.0428	0.044	0.0447	0.0431	0.0435	0.043	0.0428	0.0428	0.0427	0.0425
plate3			Temperature()	1	2	3	4	5	6	7	8	9	10	11	12
			22.5	0.0427	0.0427	0.0422	0.0427	0.0422	0.0427	0.0445	0.0429	0.0423	0.0423	0.0419	0.0424
				0.0441	0.5874	0.417	0.5296	0.6652	0.3706	0.6074	0.6632	0.619	0.6497	0.6681	0.0426
				0.0423	0.5873	0.4213	0.5389	0.6779	0.3752	0.63	0.6756	0.6218	0.6587	0.6672	0.0428
				0.0425	0.5877	0.4217	0.52	0.6088	0.3776	0.6369	0.6646	0.6283	0.669	0.6307	0.0428
				0.0424	0.2471	0.5015	0.6222	0.6694	0.5174	0.6593	0.6633	0.7051	0.673	0.6583	0.043
				0.0424	0.2427	0.5068	0.6287	0.6723	0.5087	0.6482	0.6779	0.6384	0.6737	0.6623	0.0439
				0.0426	0.2412	0.4933	0.55	0.6602	0.5045	0.643	0.6568	0.6403	0.6361	0.6715	0.0424
				0.0432	0.0423	0.0428	0.044	0.0447	0.0431	0.0435	0.043	0.0428	0.0428	0.0427	0.0425
plate4			Temperature()	1	2	3	4	5	6	7	8	9	10	11	12
			22.8	0.0423	0.0423	0.0426	0.0423	0.0423	0.0426	0.0422	0.0424	0.0421	0.0423	0.0425	0.0429
				0.0429	0.6019	0.6684	0.6663	0.6614	0.6676	0.6611	0.6814	0.453	0.6191	0.6513	0.0425
				0.0421	0.6361	0.6957	0.6357	0.6723	0.6783	0.6659	0.6788	0.448	0.6234	0.6546	0.0422
				0.0426	0.6224	0.6711	0.6713	0.677	0.6744	0.6625	0.636	0.4449	0.6378	0.6573	0.043
				0.0429	0.2525	0.6622	0.6761	0.6841	0.6662	0.6763	0.6801	0.5175	0.6673	0.655	0.0431
				0.0426	0.2475	0.6462	0.6535	0.6904	0.6673	0.6789	0.6813	0.5163	0.6571	0.6389	0.0426
				0.0425	0.2604	0.6435	0.6495	0.6676	0.6552	0.6569	0.6559	0.5138	0.6601	0.6481	0.0428
				0.0423	0.0423	0.0422	0.044	0.0425	0.0425	0.0427	0.0428	0.0426	0.0426	0.0428	0.0425
plate5			Temperature()	1	2	3	4	5	6	7	8	9	10	11	12
			22.9	0.042	0.0421	0.0432	0.0423	0.0423	0.0425	0.0424	0.0423	0.0421	0.0421	0.0428	0.0427
				0.0428	0.5958	0.5742	0.6698	0.6229	0.207	0.5483	0.6961	0.6216	0.6636	0.6669	0.0426
				0.0422	0.599	0.5715	0.673	0.6682	0.206	0.5521	0.6866	0.6504	0.6559	0.6618	0.0424
				0.0428	0.5938	0.5727	0.675	0.6704	0.2095	0.5434	0.5188	0.6854	0.6861	0.5881	0.0428
				0.043	0.2561	0.6349	0.6775	0.6628	0.5209	0.6715	0.6919	0.7924	0.682	0.6557	0.0429
				0.0429	0.2458	0.634	0.6696	0.6645	0.534	0.6556	0.6847	0.6429	0.6663	0.6613	0.0428
				0.0442	0.2407	0.6414	0.6636	0.6403	0.5584	0.6565	0.6585	0.672	0.6698	0.6566	0.0427
				0.0424	0.0424	0.0423	0.0422	0.0424	0.043	0.0427	0.0428	0.0428	0.0871	0.0425	0.0423
plate6			Temperature()	1	2	3	4	5	6	7	8	9	10	11	12
			23	0.042	0.0424	0.0427	0.0424	0.0423	0.0428	0.0425	0.0423	0.0421	0.0423	0.0425	0.0426
				0.0428	0.6187	0.5748	0.6417	0.6334	0.4667	0.5304	0.6731	0.6802	0.638	0.5938	0.0425
				0.042	0.5804	0.5751	0.6414	0.6551	0.4609	0.5359	0.6631	0.6936	0.6539	0.6587	0.0423
				0.0426	0.5848	0.5893	0.6488	0.6481	0.4594	0.5402	0.6627	0.6903	0.5971	0.6484	0.0426
				0.043	0.2756	0.6346	0.6527	0.6681	0.5532	0.6121	0.6794	0.6664	0.6624	0.6464	0.043
				0.0433	0.24	0.6	0.643	0.6588	0.5302	0.6237	0.6662	0.6492	0.6532	0.6389	0.0425
				0.0436	0.2474	0.5932	0.6278	0.6428	0.494	0.6266	0.6611	0.6543	0.5761	0.6176	0.0474
				0.0424	0.0423	0.0424	0.0425	0.0429	0.0425	0.0431	0.0434	0.0426	0.0426	0.0455	0.0428
plate7			Temperature()	1	2	3	4	5	6	7	8	9	10	11	12
			23.6	0.0415	0.0451	0.0432	0.0428	0.0423	0.0428	0.0426	0.0429	0.0423	0.0423	0.0421	0.0425
				0.0422	0.6352	0.4514	0.6588	0.6862	0.5319	0.6603	0.6728	0.4653	0.6227	0.66	0.0425
				0.0427	0.6129	0.4764	0.6582	0.6789	0.5392	0.6616	0.6785	0.4673	0.6445	0.6553	0.0429
				0.0424	0.6128	0.478	0.6578	0.6684	0.5422	0.6735	0.6661	0.4732	0.6414	0.6444	0.0428
				0.0428	0.2609	0.5608	0.658	0.6726	0.6806	0.6333	0.6803	0.5693	0.6525	0.6478	0.0428
				0.0426	0.2291	0.5886	0.6503	0.6778	0.669	0.6725	0.665	0.5982	0.6649	0.6353	0.0428
				0.0432	0.247	0.5971	0.6773	0.6682	0.6674	0.6722	0.6579	0.591	0.6426	0.6583	0.0432
				0.0423	0.0421	0.0433	0.0429	0.0429	0.0431	0.0426	0.0428	0.0428	0.0433	0.0436	0.0424
plate8			Temperature()	1	2	3	4	5	6	7	8	9	10	11	12
			23.7	0.0423	0.0424	0.0429	0.0429	0.0427	0.0429	0.0426	0.0427	0.0422	0.0423	0.0428	0.0428
				0.0436	0.6	0.5897	0.6728	0.6716	0.5753	0.6386	0.7032	0.3896	0.6448	0.6818	0.0427
				0.0451	0.6138	0.5894	0.6669	0.6839	0.5523	0.6693	0.7117	0.3922	0.6076	0.6679	0.0425
				0.0433	0.6066	0.5832	0.6684	0.6836	0.571	0.6588	0.6965	0.3931	0.6675	0.6808	0.0425
				0.0433	0.2555	0.6467	0.6098	0.6691	0.6629	0.6667	0.7009	0.543	0.6828	0.6664	0.0429
				0.0426	0.2486	0.6361	0.649	0.6862	0.6606	0.667	0.6945	0.5384	0.6841	0.6804	0.0428
				0.0427	0.2566	0.6357	0.6389	0.6689	0.6392	0.6658	0.6714	0.4807	0.6843	0.7064	0.043
				0.0428	0.046	0.0426	0.0435	0.0427	0.0428	0.0428	0.0429	0.0427	0.0425	0.0424	0.0424
plate9		Temperature()	1	2	3	4	5	6	7	8	9	10	11	12
		18	0.0473	0.049	0.0497	0.05	0.0529	0.0459	0.0464	0.0448	0.0437	0.0447	0.0434	0.0423
			0.0494	0.3308	0.5087	0.3558	0.3588	1.4259	0.3391	0.3149	0.3352	0.2894	0.0449	0.0443
			0.0492	0.3408	0.3776	0.3835	0.3538	0.3664	0.2984	0.3268	0.2852	0.3273	0.0481	0.0464
			0.0506	0.3352	0.7068	0.3464	0.3214	0.3071	0.2958	0.3241	0.3459	0.3333	0.049	0.0503
			0.0523	0.365	0.4574	0.3143	0.3434	0.3161	0.3629	0.3071	0.3335	0.3128	0.051	0.0522
			0.0491	0.5632	0.3516	0.3324	0.3259	0.3223	0.269	0.3167	0.3273	0.05	0.053	0.0522
			0.0569	0.3257	0.395	0.349	0.3213	0.306	0.3068	0.3163	0.2623	0.05	0.0531	0.0458
			0.0618	0.0504	0.0538	0.0654	0.0599	0.0553	0.053	0.0517	0.0513	0.0585	0.0465	0.0436
plate 10			Temperature()	1	2	3	4	5	6	7	8	9	10	11	12
			18.1	0.0427	0.0433	0.0435	0.0436	0.0432	0.0436	0.0436	0.0436	0.0433	0.0432	0.0431	0.0431
				0.0447	0.3188	0.3033	0.298	0.3163	0.3265	0.3058	0.3317	0.2888	0.3073	0.3131	0.0435
				0.0448	0.3503	0.2817	0.2936	0.3397	0.3121	0.3206	0.3251	0.2967	0.3076	0.3159	0.0446
				0.0386	0.344	0.3094	0.2932	0.3262	0.3041	0.3004	0.3123	0.3556	0.3247	0.3078	0.046
				0.0388	0.3318	0.298	0.3003	0.2998	0.3187	0.3085	0.3043	0.3064	0.3175	0.3111	0.0463
				0.0429	0.3149	0.287	0.31	0.3262	0.3044	0.2938	0.3083	0.3086	0.3069	0.2974	0.0472
				0.041	0.3202	0.2503	0.2923	0.3021	0.2926	0.3092	0.3111	0.3132	0.31	0.3395	0.0481
				0.0453	0.0439	0.0451	0.0445	0.045	0.0461	0.0462	0.0468	0.0472	0.0475	0.0483	0.0484
plate11			Temperature()	1	2	3	4	5	6	7	8	9	10	11	12
			18.2	0.0515	0.0447	0.0438	0.0436	0.0437	0.0438	0.0435	0.0435	0.0432	0.0435	0.0436	0.0432
				0.0454	0.3029	0.2908	0.3259	0.3123	0.3334	0.3	0.3123	0.2465	0.3319	0.3307	0.0432
				0.0396	0.3304	0.3166	0.2982	0.3115	0.3322	0.3061	0.3213	0.2255	0.3194	0.325	0.0433
				0.0448	0.3637	0.3104	0.304	0.287	0.3502	0.3164	0.3152	0.2451	0.3102	0.3174	0.0435
				0.0447	0.3146	0.3374	0.3142	0.3426	0.3467	0.3088	0.3377	0.3225	0.3104	0.3202	0.0442
				0.0439	0.3141	0.3111	0.3093	0.3023	0.347	0.3088	0.3378	0.3064	0.3132	0.2862	0.0448
				0.0421	0.3143	0.3852	0.307	0.2773	0.3534	0.2968	0.3155	0.3038	0.2947	0.2936	0.0443
				0.0442	0.0444	0.0448	0.045	0.045	0.0435	0.0451	0.0452	0.0457	0.0453	0.0456	0.0438
plate12			Temperature()	1	2	3	4	5	6	7	8	9	10	11	12
			18.3	0.0434	0.0436	0.0437	0.0436	0.0441	0.0477	0.0451	0.0438	0.0435	0.0438	0.0445	0.0445
				0.0463	0.3295	0.3276	0.3007	0.3261	0.3482	0.3013	0.2987	0.3253	0.3109	0.2809	0.0496
				0.0444	0.3289	0.3016	0.314	0.2978	0.3765	0.2992	0.3016	0.3014	0.3146	0.2828	0.045
				0.0443	0.3408	0.315	0.3059	0.3217	0.3291	0.2762	0.292	0.3228	0.3046	0.291	0.0454
				0.0435	0.2996	0.2953	0.3009	0.3007	0.3222	0.2576	0.2912	0.3191	0.3027	0.2867	0.046
				0.0469	0.3237	0.3226	0.3037	0.2822	0.3076	0.2936	0.29	0.3143	0.2824	0.2987	0.0469
				0.0448	0.2982	0.3103	0.3062	0.3023	0.3185	0.2778	0.2856	0.3103	0.2846	0.2699	0.0467
				0.0446	0.0451	0.0462	0.0453	0.0456	0.046	0.0458	0.0484	0.0474	0.0459	0.0466	0.0462
plate13
			Temperature()	1	2	3	4	5	6	7	8	9	10	11	12
			18.4	0.0429	0.0445	0.0442	0.0439	0.0463	0.0442	0.044	0.0445	0.0442	0.0445	0.0446	0.045
				0.0457	0.3079	0.4568	0.3321	0.3317	0.3093	0.3924	0.3325	0.5106	0.3188	0.3369	0.0462
				0.0449	0.3138	0.4699	0.3219	0.3231	0.3193	0.3705	0.3115	0.5419	0.318	0.3309	0.0468
				0.0445	0.3299	0.3207	0.2982	0.312	0.324	0.2881	0.2953	0.3522	0.2917	0.3138	0.0472
				0.0468	0.3218	0.3279	0.3038	0.3054	0.2962	0.3368	0.2842	0.2997	0.3153	0.2834	0.0476
				0.0473	0.3257	0.3073	0.3049	0.3159	0.3121	0.3059	0.2724	0.3039	0.3254	0.2937	0.0483
				0.0469	0.3029	0.3046	0.3054	0.3114	0.3063	0.3208	0.2982	0.3229	0.2998	0.3035	0.0471
				0.0444	0.0459	0.0462	0.0473	0.0482	0.0483	0.0491	0.0502	0.05	0.0487	0.047	0.0456
plate14			Temperature()	1	2	3	4	5	6	7	8	9	10	11	12
			18.5	0.0449	0.0443	0.0448	0.0443	0.0446	0.0455	0.0451	0.0455	0.0443	0.0452	0.0454	0.0444
				0.0451	0.2908	0.3793	0.318	0.3287	0.3082	0.2998	0.3024	0.2037	0.3163	0.2945	0.046
				0.0462	0.3275	0.3264	0.3156	0.3283	0.2959	0.3017	0.2856	0.2021	0.3036	0.3211	0.0466
				0.0518	0.3236	0.3339	0.3047	0.2884	0.3164	0.2917	0.3018	0.3617	0.3278	0.3068	0.0482
				0.0492	0.3123	0.3133	0.3015	0.2936	0.3167	0.2881	0.2944	0.3326	0.3228	0.315	0.0502
				0.047	0.3262	0.3091	0.3118	0.3054	0.3115	0.3007	0.3046	0.3174	0.3125	0.3107	0.0501
				0.0472	0.3216	0.3246	0.3192	0.3176	0.3107	0.3046	0.2964	0.2975	0.3116	0.3119	0.0502
				0.0478	0.0488	0.0477	0.05	0.0496	0.0499	0.0515	0.051	0.0519	0.0501	0.0506	0.0491
plate15		Temperature()	1	2	3	4	5	6	7	8	9	10	11	12
		18.6	0.0513	0.0548	0.0541	0.0516	0.0529	0.0539	0.0532	0.0537	0.0555	0.0591	0.0469	0.0434
			0.0567	0.2889	0.4515	0.3361	0.2054	0.3387	0.4286	0.3292	0.4136	0.3471	0.3037	0.05
			0.0504	0.3306	0.4716	0.3272	0.386	0.3724	0.4351	0.3203	0.4265	0.3582	0.3331	0.0584
			0.0501	0.3464	0.3568	0.3398	0.3479	0.3682	0.3262	0.343	0.3264	0.3494	0.3291	0.0521
			0.0398	0.3443	0.3837	0.324	0.35	0.3406	0.3926	0.325	0.3501	0.3431	0.3374	0.051
			0.0513	0.3351	0.3641	0.3495	0.3638	0.3547	0.3355	0.3314	0.3862	0.3299	0.3491	0.0511
			0.0589	0.3167	0.337	0.3414	0.3272	0.3118	0.3344	0.3338	0.3235	0.3565	0.3463	0.0516
			0.0507	0.0535	0.0508	0.0455	0.0485	0.0498	0.0498	0.0506	0.0495	0.0508	0.0534	0.0492
plate16		Temperature()	0.0473	0.049	0.0497	0.05	0.0529	0.0459	0.0464	0.0448	0.0437	0.0447	0.0434	0.0423
		18.6	0.0494	0.3308	0.5087	0.3558	0.3588	1.4259	0.3391	0.3149	0.3352	0.2894	0.0449	0.0443
			0.0492	0.3408	0.3776	0.3835	0.3538	0.3664	0.2984	0.3268	0.2852	0.3273	0.0481	0.0464
			0.0506	0.3352	0.7068	0.3464	0.3214	0.3071	0.2958	0.3241	0.3459	0.3333	0.049	0.0503
			0.0523	0.365	0.4574	0.3143	0.3434	0.3161	0.3629	0.3071	0.3335	0.3128	0.051	0.0522
			0.0491	0.5632	0.3516	0.3324	0.3259	0.3223	0.269	0.3167	0.3273	0.05	0.053	0.0522
			0.0569	0.3257	0.395	0.349	0.3213	0.306	0.3068	0.3163	0.2623	0.05	0.0531	0.0458
			0.0618	0.0504	0.0538	0.0654	0.0599	0.0553	0.053	0.0517	0.0513	0.0585	0.0465	0.0436
plate17			Temperature()	1	2	3	4	5	6	7	8	9	10	11	12
			21	0.042	0.0424	0.0427	0.0424	0.0423	0.0428	0.0425	0.0423	0.0421	0.0423	0.0425	0.0426
				0.0428	0.5187	0.5748	0.6417	0.6334	0.4667	0.5304	0.6731	0.6802	0.638	0.5938	0.0425
				0.042	0.4804	0.4751	0.6414	0.6551	0.4609	0.5359	0.6631	0.6936	0.6539	0.6587	0.0423
				0.0426	0.4848	0.5893	0.6488	0.6481	0.4594	0.5402	0.6627	0.6903	0.5971	0.6484	0.0426
				0.043	0.2756	0.5346	0.6527	0.6681	0.5532	0.6121	0.6794	0.6664	0.6624	0.6464	0.043
				0.0433	0.24	0.6	0.643	0.6588	0.5302	0.6237	0.6662	0.6492	0.6532	0.6389	0.0425
				0.0436	0.2474	0.5932	0.6278	0.6428	0.494	0.6266	0.6611	0.6543	0.5761	0.6176	0.0474
				0.0424	0.0423	0.0424	0.0425	0.0429	0.0425	0.0431	0.0434	0.0426	0.0426	0.0455	0.0428
plate18			Temperature()	1	2	3	4	5	6	7	8	9	10	11	12
			21	0.0415	0.0451	0.0432	0.0428	0.0423	0.0428	0.0426	0.0429	0.0423	0.0423	0.0421	0.0425
				0.0422	0.6352	0.4514	0.6588	0.6862	0.5319	0.6603	0.6728	0.4653	0.6227	0.66	0.0425
				0.0427	0.4129	0.4764	0.6582	0.6789	0.5392	0.6616	0.6785	0.4673	0.6445	0.6553	0.0429
				0.0424	0.3128	0.478	0.5578	0.6684	0.5422	0.6735	0.6661	0.4732	0.6414	0.6444	0.0428
				0.0428	0.2609	0.5608	0.658	0.6726	0.6806	0.6333	0.6803	0.5693	0.6525	0.6478	0.0428
				0.0426	0.2291	0.5886	0.5503	0.6778	0.669	0.6725	0.665	0.5982	0.6649	0.6353	0.0428
				0.0432	0.247	0.5971	0.5773	0.6682	0.6674	0.6722	0.6579	0.591	0.6426	0.6583	0.0432
				0.0423	0.0421	0.0433	0.0429	0.0429	0.0431	0.0426	0.0428	0.0428	0.0433	0.0436	0.0424
